# Supplementary material for: F1099L-CFTR (c.3297C>G) has Impaired Channel Function and Associates with Mild Disease Phenotypes in Two Pediatric Patients
Source: MDPI journal article supplement (doi:10.3390/life11020131), 2021-02-08
Supplement: s1 [file s1]

Article

# F1099L-CFTR (c.3297C>G) has Impaired Channel Function and Associates with Mild Disease Phenotypes in Two Pediatric Patients

Xiaoying Zhang<sup>1</sup>, Jaspal S. Hothi<sup>1,2</sup>, Yanhui H. Zhang<sup>3</sup>, Aixia Ren<sup>1</sup>, Michael J. Rock<sup>4</sup>, Saumini Srinivasan<sup>1,2</sup>, Dennis C. Stokes<sup>1,2</sup>, Anjaparavanda P. Naren<sup>5</sup> and Weiqiang Zhang<sup>1,2,6,7,\*</sup>

<sup>1</sup> Department of Pediatrics, College of Medicine, University of Tennessee Health Science Center, Memphis, TN 38103, USA; xiaoyingzhang@imm.ac.cn (X.Z.); JHothi2@dmc.org (J.S.H.); aixia.ren@stjude.org (A.R.); ssriniv2@uthsc.edu (S.S.); dennis.stokes@vumc.org (D.C.S.)

<sup>2</sup> University of Tennessee Cystic Fibrosis Care and Research Center at Le Bonheur Children's Hospital - Methodist University Hospital, Memphis, TN 38103, USA

<sup>3</sup> Department of Bioscience research, College of Dentistry, University of Tennessee Health Science Center, Memphis, TN 38163, USA; yzhang36@uthsc.edu

<sup>4</sup> Department of Pediatrics, University of Wisconsin School of Medicine and Public Health, Madison, WI 53792, USA; mjrock@wisc.edu

<sup>5</sup> Department of Pediatrics, Cincinnati Children's Hospital Medical Center, 3333 Burnet Avenue, R-4041, Cincinnati, OH 45229, USA; anaren@cchmc.org

<sup>6</sup> Department of Physiology, College of Medicine, University of Tennessee Health Science Center, Memphis, TN 38163, USA

<sup>7</sup> Children's Foundation Research Institute, Le Bonheur Children's Hospital, Memphis, TN 38103, USA

\* Correspondence: wzhang16@uthsc.edu; Tel.: +1-(901)-287-5367

**Citation:** Zhang, X.; Hothi, J.S.; Zhang, Y.H.; Ren, A.; Rock, M.J.; Srinivasan, S.; Stokes, D.C.; Naren, A.P.; Zhang, W. F1099L-CFTR (c.3297C>G) has Impaired Channel Function and Associates with Mild Disease Phenotypes in Two Pediatric Patients. *Life* **2021**, *11*, 131. <https://doi.org/10.3390/life11020131>

Received: 24 December 2020

Accepted: 05 February 2021

Published: date

**Publisher's Note:** MDPI stays neutral with regard to jurisdictional claims in published maps and institutional affiliations.

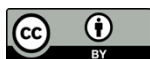

**Copyright:** © 2021 by the authors. Submitted for possible open access publication under the terms and conditions of the Creative Commons Attribution (CC BY) license (<http://creativecommons.org/licenses/by/4.0/>).

## Supplementary Materials

### Note:

The densities of Western blots bands were quantified using ImageJ software (U.S. National Institutes of Health). We followed the method of 'Analyzing gels and western blots with ImageJ' (<https://lukemiller.org/index.php/2010/11/analyzing-gels-and-western-blot-with-image-j/>).

The CFTR maturation efficiency was defined as a ratio of the mature form CFTR (density of Band C) to the total CFTR protein (density of Band B plus Band C).

The CFTR total protein level was defined as the density of Band B plus Band C. Prior to comparisons, the CFTR bands densities were first normalized to their respective  $\beta$ -actin levels (bands densities).

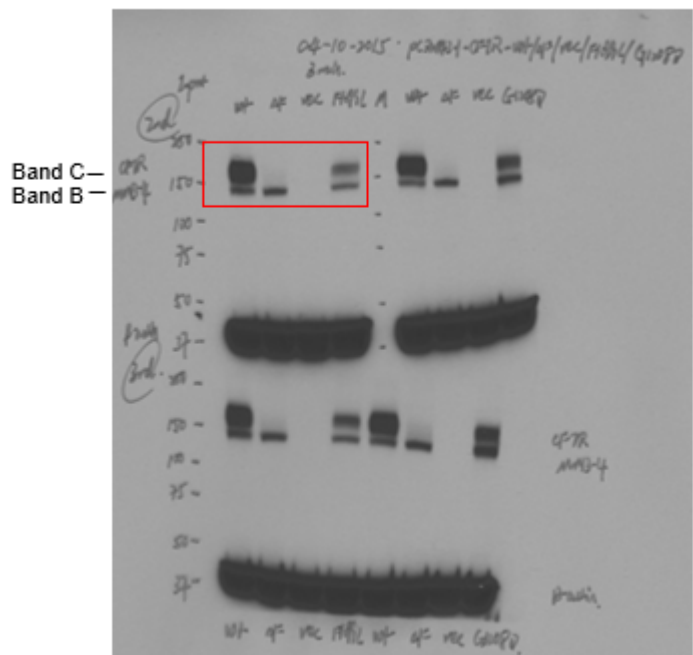

(a)

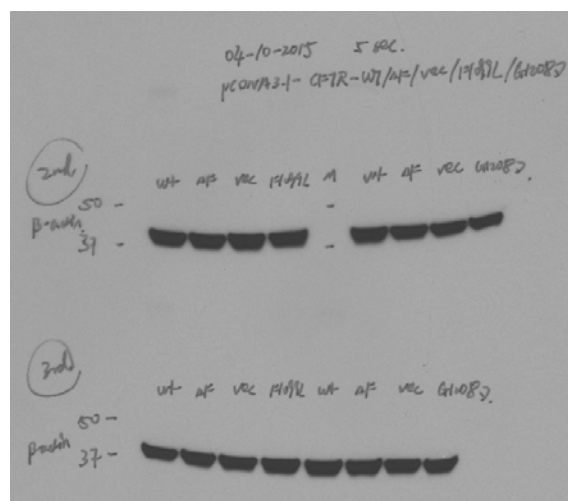

(b)

| 2nd Exp_04-10-2015              |          |              |                                                         |              |                           |
|---------------------------------|----------|--------------|---------------------------------------------------------|--------------|---------------------------|
| 1. Band c/ total (band b + c)   |          |              |                                                         |              |                           |
| Raw data (Area)                 |          |              |                                                         |              |                           |
|                                 |          | total (Area) |                                                         | band c/total | band c /total protein (%) |
| WT band C                       | 55940.37 |              |                                                         | 0.863074     | 86.3074                   |
| WT band B                       | 8874.898 | 64815.27     |                                                         |              |                           |
| F1099L band C                   | 28736.15 |              |                                                         |              |                           |
| F1099L band B                   | 16317.58 | 45053.74     |                                                         | 0.63782      | 63.78195                  |
| 2. Total protein                |          |              | Using the 'straight line' tool to cover the whole area. |              |                           |
| Raw data                        |          |              | Ajusted (protein/actin)                                 |              |                           |
| WT                              | 127205.5 |              | 1.361107                                                |              |                           |
| WT_actin                        | 93457.34 |              |                                                         |              |                           |
| F1099L                          | 67753.56 |              |                                                         |              |                           |
| F1099L_actin                    | 100471.3 |              | 0.674358                                                |              |                           |
| F1099L/WT (normalized to actin) |          |              | 0.495448                                                |              |                           |

(c)

**Figure S1.** Original Western blot images of Figure 1A in the manuscript. **(a)** (In the red Text Box) from left to right: WT-CFTR, F508del-CFTR, Vector, and F1099L-CFTR. Exposure time: 3 min. The Western blotting experiments were repeated 3 times. Shown in this blot were the 2nd and the 3rd experiments. The blot from the 2nd experiment (in the red Text Box) was used as the representative blot in the manuscript (Figure 1A). **(b)** Original image of  $\beta$ -actin exposed for 5 s. The blot in the red Text Box was used in Figure 1A. **(c)** Densitometry readings of WT-CFTR and F1099L-CFTR bands using ImageJ software. Maturation efficiency (Band c/total (band b+c): WT-CFTR (86.3%), F1099L-CFTR (63.8%). Total protein (F1099L was 49.5% of WT-CFTR).

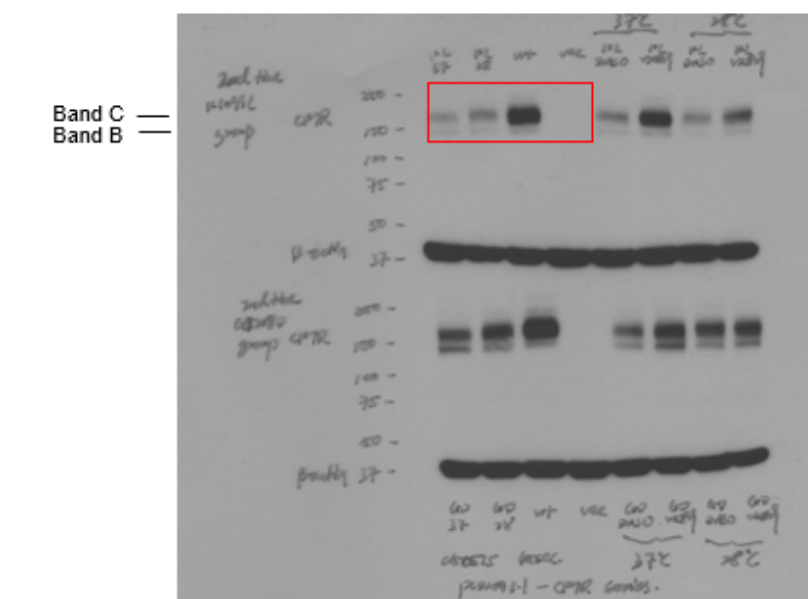

**(a)**

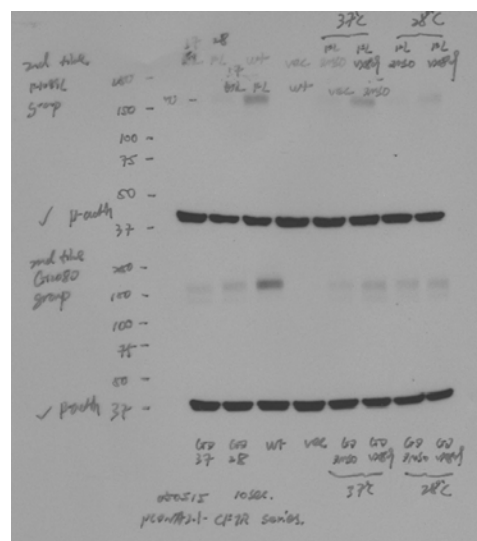

**(b)**





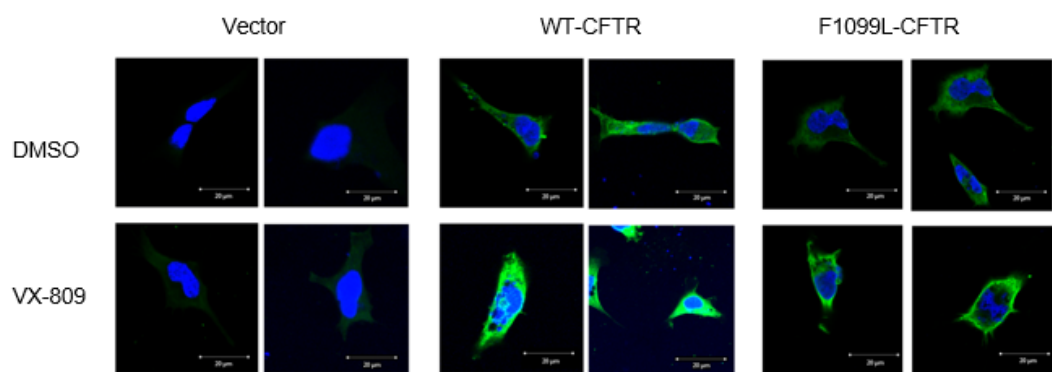

**Figure S4.** VX-809 increased the total CFTR protein level of F1099L mutation and promoted its maturation as evidenced by immunofluorescence imaging data. F1099L-CFTR-, WT-CFTR-, and vector-transfected HEK-293 cells were treated with VX-809 (5  $\mu$ M) or DMSO and then subjected to immunofluorescence labeling and imaging.
